## Contributors

KATHERINE BLISS is assistant professor of Latin American history at the University of Massachusetts, Amherst. Her work on the history of sexuality and social reform during the Mexican Revolution has appeared in essay collections published in Mexico and in the United States. She is currently working on a manuscript about female prostitution and reform politics in revolutionary Mexico City and conducting research on the history of reproductive health policy in twentieth-century Guanajuato and Oaxaca.

ALEXANDRA MINNA STERN is completing her dissertation on eugenics and medicalization in the Americas at the University of Chicago. She is also a research associate at the Historical Center for the Health Sciences at the University of Michigan Medical Center. Stern has several articles on eugenics, immigration, and nationalism forthcoming in journals and anthologies in Mexico and the United States.

LEE M. PENYAK received his training at Fairfield University and the University of Connecticut, where he completed a dissertation entitled "Criminal Sexuality in Central Mexico, 1750–1850." He has published articles on the Inquisition, Mexico's legal system, caudillaje and Guatemala's military establishment, and pedagogy. He is presently researching midwifery in Mexico in the eighteenth and nineteenth centuries. Penyak has lived in Mexico City for the last ten years and is chair of the social studies department at The American School Foundation, where he teaches Mexican history.
